# Supplementary material for: Identification of Key Aroma Compounds Responsible for the Floral Ascents of Green and Black Teas from Different Tea Cultivars
Source: MDPI journal article supplement (doi:10.3390/molecules27092809), 2022-04-28
Supplement: s1 [file s1]

Table S1 Comprehensive sensory evaluation results of green and black teas.

| Tea samples      | Dry tea appearance                                     |       | Tea infusion color                     |       | Tea taste                            |       | Tea aroma                                        |       | Brewed leaves                                       |       | Total score <sup>a</sup> |
|------------------|--------------------------------------------------------|-------|----------------------------------------|-------|--------------------------------------|-------|--------------------------------------------------|-------|-----------------------------------------------------|-------|--------------------------|
|                  | Description                                            | Score | Description                            | Score | Description                          | Score | Description                                      | Score | Description                                         | Score |                          |
| <i>Green tea</i> |                                                        |       |                                        |       |                                      |       |                                                  |       |                                                     |       |                          |
| Chunyu2          | Burly, greyish green, hairy                            | 92    | light yellowish green, bright          | 92    | <i>Umami</i> , mellow                | 94    | <b>Long-lasting lily of the valley fragrance</b> | 95    | Burly, delicate green, comparatively bright         | 93    | 93.45                    |
| Chunyu1          | Delicate green, comparatively smooth                   | 93    | Delicate green, bright                 | 93    | <i>Umami</i> , mellow                | 93    | Faint scent                                      | 91    | Slightly thin, delicate green, comparatively bright | 91.5  | 92.35                    |
| Longjing43       | Greyish green, hairy                                   | 90    | Yellowish green, bright                | 91    | Astringent                           | 87    | Green and grassy                                 | 88    | Green, bright                                       | 90    | 88.70                    |
| Zhenong117       | Burly, barely delicate green, barely smooth            | 93    | Light green, bright                    | 94    | <i>Umami</i> , barely mellow, smooth | 94    | Tender, strong aroma                             | 93    | Burly, delicate green, bright                       | 94    | 93.50                    |
| Jinguanyin       | Slightly flat and burly, dark green                    | 89    | Bright yellow                          | 92    | Barely <i>umami</i> , mellow         | 92    | <b>Long-lasting rose fragrance</b>               | 93    | Burly, delicate green, bright                       | 94    | 91.70                    |
| <i>Black tea</i> |                                                        |       |                                        |       |                                      |       |                                                  |       |                                                     |       |                          |
| Chunyu2          | Tight and sturdy, hairy, dark and smooth               | 93    | Light orange red, barely bright        | 92    | <i>Umami</i> , mellow                | 93    | <b>Floral aroma</b>                              | 93    | Burly, red, comparatively bright                    | 91    | 92.70                    |
| Chunyu1          | Tight and slender, hairy, dark and smooth              | 94    | Orange red, comparatively bright       | 93    | Barely mellow and thick              | 92    | Sweet aroma                                      | 92    | Slightly slender, red, comparatively bright         | 91    | 92.50                    |
| Longjing43       | Tight and slender, a bit hairy, dark and barely smooth | 91    | Light orange red, comparatively bright | 89    | Light, comparatively thin            | 86    | Sweet aroma                                      | 86    | Red, comparatively dark                             | 89    | 87.85                    |
| Zhenong117       | Tight and slightly sturdy, hairy, dark and smooth      | 93    | Light orange red, comparatively bright | 92    | Barely mellow, slightly astringent   | 89    | Faint sweet aroma, a bit green                   | 88    | Burly, comparatively red and bright                 | 92    | 90.35                    |
| Jinguanyin       | Tight and sturdy, hairy, dark and smooth               | 92    | Dark orange yellow, barely bright      | 91    | Barely mellow                        | 91    | <b>Long-lasting rose fragrance, sweet aroma</b>  | 95    | Burly, comparatively red and bright                 | 92    | 92.35                    |

Total score= The score of dry tea appearance×25%+ the score of tea infusion color×10%+the score of tea taste×30%+the score of tea aroma×25%+the score of brewed leaves×10%.

Table S2 The volatile compositions of green teas prepared from different tea cultivars ( $\mu\text{g}$  guaiacol equivalent/g dry tea).<sup>a</sup>

| Compounds                                                                                                                      | RI <sup>b</sup> | Chunyu2          | Chunyu1          | Longjing43       | Zhenong117       | Jinguanyin       |
|--------------------------------------------------------------------------------------------------------------------------------|-----------------|------------------|------------------|------------------|------------------|------------------|
| <i>Alcohols</i>                                                                                                                |                 |                  |                  |                  |                  |                  |
| 3,7-Dimethylocta-1,6-dien-3-ol                                                                                                 | 1524            | 64.79 $\pm$ 1.33 | 10.07 $\pm$ 1.09 | 6.77 $\pm$ 1.17  | 20.73 $\pm$ 1.73 | 10.77 $\pm$ 0.34 |
| (2 <i>E</i> )-3,7-Dimethylocta-2,6-dien-1-ol                                                                                   | 1806            | 11.32 $\pm$ 0.37 | 7.50 $\pm$ 0.84  | 14.08 $\pm$ 2.21 | 3.51 $\pm$ 0.43  | 31.13 $\pm$ 1.47 |
| 2-[(2 <i>S</i> ,5 <i>S</i> )-5-Ethenyl-5-methyloxolan-2-yl]propan-2-ol                                                         | 1443            | 4.01 $\pm$ 0.91  | ND               | 0.79 $\pm$ 0.25  | 0.41 $\pm$ 0.22  | 1.03 $\pm$ 0.12  |
| ( <i>Z</i> )-hex-3-en-1-ol                                                                                                     | 1370            | 1.29 $\pm$ 0.16  | 0.47 $\pm$ 0.04  | 0.77 $\pm$ 0.11  | 1.51 $\pm$ 0.20  | 0.24 $\pm$ 0.03  |
| dodecan-1-ol                                                                                                                   | 1868            | 1.35 $\pm$ 0.24  | 0.66 $\pm$ 0.16  | 0.63 $\pm$ 0.31  | 0.44 $\pm$ 0.07  | 0.62 $\pm$ 0.07  |
| (1 <i>S</i> ,2 <i>R</i> ,5 <i>S</i> ,7 <i>R</i> ,8 <i>R</i> )-2,6,6,8-Tetramethyltricyclo[5.3.1.0 <sup>1,5</sup> ]undecan-8-ol | 2022            | 0.99 $\pm$ 0.29  | 0.48 $\pm$ 0.03  | 0.67 $\pm$ 0.59  | 0.41 $\pm$ 0.06  | 0.46 $\pm$ 0.15  |
| 2-(4-Methylcyclohex-3-en-1-yl)propan-2-ol                                                                                      | 1661            | 1.90 $\pm$ 0.21  | ND               | ND               | ND               | 0.41 $\pm$ 0.09  |
| Pentan-1-ol                                                                                                                    | 1242            | ND               | 0.62 $\pm$ 0.03  | 0.38 $\pm$ 0.08  | 0.46 $\pm$ 0.06  | 0.25 $\pm$ 0.04  |
| Oct-1-en-3-ol                                                                                                                  | 1428            | 0.19 $\pm$ 0.02  | 0.41 $\pm$ 0.03  | 0.68 $\pm$ 0.17  | ND               | 0.43 $\pm$ 0.01  |
| Octan-1-ol                                                                                                                     | 1533            | ND               | 0.66 $\pm$ 0.06  | 1.01 $\pm$ 0.31  | ND               | ND               |
| 2-Ethylhexan-1-ol                                                                                                              | 1465            | 0.28 $\pm$ 0.07  | 0.26 $\pm$ 0.06  | 0.46 $\pm$ 0.11  | 0.43 $\pm$ 0.14  | 0.20 $\pm$ 0.03  |
| 6-Ethenyl-2,2,6-trimethyloxan-3-ol                                                                                             | 1704            | 1.28 $\pm$ 0.24  | ND               | ND               | ND               | 0.20 $\pm$ 0.01  |
| Nonan-1-ol                                                                                                                     | 1628            | 0.21 $\pm$ 0.02  | 0.60 $\pm$ 0.15  | 0.25 $\pm$ 0.04  | 0.22 $\pm$ 0.02  | 0.13 $\pm$ 0.02  |
| (5 <i>E</i> )-3,7-Dimethylocta-1,5,7-trien-3-ol                                                                                | 1582            | 0.43 $\pm$ 0.08  | 0.15 $\pm$ 0.02  | 0.05 $\pm$ 0.01  | 0.34 $\pm$ 0.05  | 0.26 $\pm$ 0.02  |
| ( <i>E</i> )-Oct-2-en-1-ol                                                                                                     | 1586            | 0.16 $\pm$ 0.02  | ND               | 0.24 $\pm$ 0.03  | 0.22 $\pm$ 0.02  | 0.30 $\pm$ 0.03  |
| ( <i>E</i> )-3,7,11,15-Tetramethylhexadec-2-en-1-ol                                                                            | 1871            | 0.18 $\pm$ 0.02  | ND               | 0.39 $\pm$ 0.05  | ND               | 0.28 $\pm$ 0.06  |
| 2-Phenylethanol                                                                                                                | 1838            | 0.37 $\pm$ 0.04  | ND               | 0.14 $\pm$ 0.03  | 0.09 $\pm$ 0.04  | 0.22 $\pm$ 0.02  |
| ( <i>E</i> )-Hex-2-en-1-ol                                                                                                     | 1390            | 0.36 $\pm$ 0.16  | ND               | ND               | 0.33 $\pm$ 0.07  | ND               |
| 2-[(1 <i>S</i> )-4-Methylcyclohex-3-en-1-yl]propan-2-ol                                                                        | 1664            | ND               | 0.16 $\pm$ 0.05  | ND               | 0.50 $\pm$ 0.10  | ND               |
| Tetradecan-1-ol                                                                                                                | 2041            | ND               | ND               | ND               | ND               | 0.62 $\pm$ 0.19  |
| (1 <i>S</i> ,4 <i>R</i> )-1,6-Dimethyl-4-propan-2-yl-3,4,4a,7,8,8a-hexahydro-2H-naphthalen-1-ol                                | 2044            | 0.19 $\pm$ 0.03  | ND               | ND               | ND               | 0.42 $\pm$ 0.24  |
| Phenylmethanol                                                                                                                 | 1821            | 0.21 $\pm$ 0.08  | ND               | ND               | ND               | 0.40 $\pm$ 0.11  |
| Hexan-1-ol                                                                                                                     | 1342            | 0.13 $\pm$ 0.01  | 0.21 $\pm$ 0.01  | 0.09 $\pm$ 0.02  | 0.18 $\pm$ 0.01  | ND               |
| Heptan-1-ol                                                                                                                    | 1436            | ND               | 0.22 $\pm$ 0.06  | 0.16 $\pm$ 0.04  | 0.17 $\pm$ 0.02  | ND               |
| Heptan-2-ol                                                                                                                    | 1310            | 0.50 $\pm$ 0.08  | ND               | ND               | ND               | ND               |
| ( <i>Z</i> )-Non-3-en-1-ol                                                                                                     | 1650            | 0.07 $\pm$ 0.01  | ND               | 0.09 $\pm$ 0.03  | 0.05 $\pm$ 0.01  | ND               |
| Total alcohols                                                                                                                 |                 | 90.21 $\pm$ 2.99 | 22.45 $\pm$ 2.07 | 27.66 $\pm$ 2.82 | 29.97 $\pm$ 2.77 | 48.34 $\pm$ 2.15 |

*Aldehydes*

|                                  |      |           |           |            |           |           |
|----------------------------------|------|-----------|-----------|------------|-----------|-----------|
| 2,4-Dimethylbenzaldehyde         | 1765 | 5.55±0.82 | 3.46±0.53 | 8.64±1.03  | 4.44±0.52 | 4.87±0.23 |
| Pentanal                         | 961  | 0.49±0.15 | 1.76±0.07 | 1.17±0.23  | 1.07±0.33 | 0.51±0.07 |
| 3-Methylbutanal                  | 936  | 0.08±0.01 | 1.59±0.20 | 0.56±0.19  | 0.92±0.11 | 0.31±0.19 |
| Hexanal                          | 1044 | 0.63±0.01 | ND        | 1.24±0.35  | 1.13±0.20 | 0.41±0.14 |
| (Z)-Hept-2-enal                  | 1289 | 0.46±0.06 | 0.47±0.18 | 0.41±0.05  | 0.71±0.24 | 0.47±0.12 |
| Nonanal                          | 1348 | 0.41±0.06 | 0.42±0.02 | 0.99±0.38  | 0.31±0.07 | 0.22±0.05 |
| Heptanal                         | 1141 | ND        | 0.98±0.29 | 0.58±0.14  | 0.56±0.12 | ND        |
| Benzaldehyde                     | 1487 | 0.28±0.13 | 0.24±0.01 | 0.56±0.15  | 0.16±0.01 | 0.14±0.01 |
| (2E)-3,7-Dimethylocta-2,6-dienal | 1690 | 0.36±0.02 | ND        | ND         | ND        | 0.77±0.03 |
| (E)-Oct-2-enal                   | 1396 | ND        | ND        | 0.18±0.05  | 0.22±0.01 | 0.22±0.04 |
| Decanal                          | 1452 | 0.56±0.12 | ND        | ND         | ND        | ND        |
| (2Z)-3,7-Dimethylocta-2,6-dienal | 1643 | ND        | ND        | 0.06±0.01  | ND        | 0.09±0.01 |
| Total aldehydes                  |      | 8.81±1.06 | 8.93±0.80 | 14.40±1.23 | 9.52±0.95 | 8.01±0.39 |

*Ketones*

|                                                      |      |           |           |           |           |           |
|------------------------------------------------------|------|-----------|-----------|-----------|-----------|-----------|
| Octane-2,3-dione                                     | 1290 | 0.65±0.15 | 0.62±0.05 | 0.84±0.27 | 0.72±0.15 | 0.73±0.03 |
| 6,10,14-Trimethylpentadecan-2-one                    | 2027 | 0.55±0.11 | 0.16±0.03 | 0.35±0.08 | 0.40±0.03 | 1.72±0.54 |
| 3-Methyl-2-[(Z)-pent-2-enyl]cyclopent-2-en-1-one     | 1850 | 0.55±0.03 | 0.33±0.05 | 0.35±0.06 | 0.89±0.13 | 0.53±0.06 |
| 4-Methylpent-3-en-2-one                              | 1108 | ND        | 1.32±0.10 | 0.16±0.02 | 0.27±0.02 | 0.40±0.06 |
| (E)-4-(2,6,6-Trimethylcyclohexen-1-yl)but-3-en-2-one | 1846 | 0.18±0.03 | ND        | 0.35±0.05 | 0.14±0.01 | ND        |
| 6-Methylhept-5-en-2-one                              | 1311 | ND        | ND        | 0.28±0.09 | 0.17±0.01 | 0.17±0.05 |
| Oct-1-en-3-one                                       | 1272 | ND        | ND        | 0.16±0.06 | 0.15±0.02 | 0.17±0.06 |
| Total ketones                                        |      | 1.93±0.14 | 2.42±0.13 | 2.49±0.45 | 2.74±0.34 | 3.72±0.57 |

*Esters*

|                                               |      |           |           |           |           |           |
|-----------------------------------------------|------|-----------|-----------|-----------|-----------|-----------|
| Bis(2-methylpropyl) benzene-1,2-dicarboxylate | 2118 | 3.04±0.81 | 1.96±0.24 | 2.28±0.08 | 2.54±0.51 | 1.79±0.27 |
| Diethyl benzene-1,2-dicarboxylate             | 2084 | 8.44±3.11 | ND        | ND        | ND        | ND        |
| [(Z)-hex-3-enyl] acetate                      | 1279 | 1.49±0.20 | 0.33±0.11 | 0.41±0.12 | 3.25±0.56 | 0.27±0.01 |
| [(Z)-hex-3-enyl] butanoate                    | 1416 | 1.16±0.05 | ND        | 0.22±0.06 | 1.79±0.09 | 0.39±0.02 |
| Methyl 2-hydroxybenzoate                      | 1727 | 0.47±0.03 | 0.49±0.18 | 0.95±0.13 | 0.81±0.19 | 0.29±0.03 |
| 1-O-Butyl 2-O-octyl benzene-1,2-dicarboxylate | 2032 | 0.84±0.31 | ND        | 0.56±0.14 | ND        | 0.46±0.09 |
| Methyl hexadecanoate                          | 2051 | 0.36±0.18 | 0.21±0.05 | 0.29±0.03 | 0.19±0.02 | 0.36±0.08 |
| Methyl 2-methyl-3-oxobutanoate                | 1669 | 0.92±0.17 | ND        | ND        | 0.22±0.05 | 0.24±0.03 |
| [(Z)-hex-3-enyl] hexanoate                    | 1609 | 0.41±0.06 | 0.21±0.05 | ND        | 0.09±0.02 | ND        |
| Propan-2-yl tetradecanoate                    | 1897 | 0.20±0.09 | 0.09±0.01 | 0.14±0.03 | 0.17±0.07 | 0.11±0.02 |
| Dibutyl benzene-1,2-dicarboxylate             | 2033 | ND        | ND        | ND        | 0.60±0.08 | ND        |

|                                                              |      |             |            |            |            |            |
|--------------------------------------------------------------|------|-------------|------------|------------|------------|------------|
| Total esters                                                 |      | 17.34±2.77  | 3.28±0.15  | 4.86±0.37  | 9.67±1.14  | 3.91±0.23  |
| <i>Pyrroles</i>                                              |      |             |            |            |            |            |
| 1-Ethylpyrrole-2-carbaldehyde                                | 1571 | 0.12±0.01   | 0.23±0.06  | 0.58±0.05  | 0.22±0.02  | ND         |
| <i>Miscellaneous</i>                                         |      |             |            |            |            |            |
| Methylsulfanylmethane                                        | 899  | 1.17±0.15   | 8.19±0.74  | 0.50±0.16  | 4.31±0.76  | 4.32±0.66  |
| Naphthalene                                                  | 1684 | 3.83±0.94   | 2.45±0.75  | 4.27±0.18  | 4.21±0.39  | 3.13±0.13  |
| 2,4-Ditert-butylphenol                                       | 2071 | 2.56±0.07   | 0.79±0.37  | 3.91±0.78  | 1.06±0.14  | 2.88±1.23  |
| 7-Methyl-3-methylideneocta-1,6-diene                         | 1114 | 2.79±0.42   | 0.97±0.17  | 1.08±0.02  | 0.84±0.15  | 2.52±0.10  |
| Methyl (Z)-N-hydroxybenzenecarboximidate                     | 1750 | 1.39±0.15   | ND         | 0.68±0.28  | 0.54±0.04  | 1.57±0.19  |
| (3E)-3,7-Dimethylocta-1,3,6-triene                           | 1186 | 2.24±0.43   | 0.26±0.01  | 0.76±0.02  | 0.17±0.01  | 1.95±0.11  |
| 1,2,4,5-Tetramethylbenzene                                   | 1380 | 0.44±0.23   | 0.36±0.16  | 0.87±0.23  | 0.89±0.11  | 0.53±0.12  |
| 4,7-Dimethyl-1-propan-2-yl-1,2,3,5,6,8a-hexahydronaphthalene | 1692 | 0.41±0.11   | 0.26±0.04  | 0.26±0.02  | ND         | 1.40±0.23  |
| (4S)-1-methyl-4-prop-1-en-2-ylcyclohexene                    | 1133 | 0.99±0.25   | ND         | ND         | ND         | 0.39±0.03  |
| 1,2,3,4-Tetramethyl-5-methylidenecyclopenta-1,3-diene        | 1433 | 0.53±0.09   | ND         | ND         | 0.79±0.05  | ND         |
| 1-Methylnaphthalene                                          | 1800 | ND          | ND         | 0.25±0.10  | 0.21±0.04  | ND         |
| Total miscellaneous                                          |      | 16.35±1.06  | 13.26±0.98 | 12.61±1.55 | 13.02±0.74 | 18.68±0.84 |
|                                                              |      |             |            |            |            |            |
| Total volatiles                                              |      | 134.75±3.01 | 50.57±3.64 | 62.60±6.36 | 65.14±5.32 | 82.65±2.71 |

<sup>a</sup> The data were expressed as mean value ± SD; ND: Not detected.

<sup>b</sup> RI: Retention index.

Table S3 The volatile compositions of black teas from different tea cultivars ( $\mu\text{g}$  guaiacol equivalent/g dry tea).<sup>a</sup>

| Compounds                                                                                                                      | RI <sup>b</sup> | Chunyu2            | Chunyu1            | Longjing43         | Zhenong117         | Jinguanyin          |
|--------------------------------------------------------------------------------------------------------------------------------|-----------------|--------------------|--------------------|--------------------|--------------------|---------------------|
| <i>Alcohols</i>                                                                                                                |                 |                    |                    |                    |                    |                     |
| 3,7-Dimethylocta-1,6-dien-3-ol                                                                                                 | 1524            | 577.99 $\pm$ 45.94 | 109.92 $\pm$ 6.08  | 103.11 $\pm$ 15.16 | 244.62 $\pm$ 26.36 | 205.52 $\pm$ 20.52  |
| (2 <i>E</i> )-3,7-Dimethylocta-2,6-dien-1-ol                                                                                   | 1806            | 206.51 $\pm$ 13.87 | 182.76 $\pm$ 28.73 | 244.16 $\pm$ 23.27 | 173.47 $\pm$ 12.24 | 879.18 $\pm$ 58.63  |
| 2-[(2 <i>S</i> ,5 <i>S</i> )-5-Ethenyl-5-methyloxolan-2-yl]propan-2-ol                                                         | 1443            | 108.50 $\pm$ 10.88 | 29.71 $\pm$ 5.03   | 39.75 $\pm$ 3.54   | 31.31 $\pm$ 7.43   | 61.15 $\pm$ 8.72    |
| 2-[(1 <i>S</i> )-4-Methylcyclohex-3-en-1-yl]propan-2-ol                                                                        | 1664            | 19.68 $\pm$ 2.43   | 4.05 $\pm$ 0.53    | 1.47 $\pm$ 0.18    | 5.94 $\pm$ 0.87    | 8.15 $\pm$ 1.06     |
| 2-Phenylethanol                                                                                                                | 1838            | 8.15 $\pm$ 0.78    | 6.17 $\pm$ 0.62    | 6.76 $\pm$ 1.01    | 9.85 $\pm$ 2.81    | 5.44 $\pm$ 0.64     |
| Hexan-1-ol                                                                                                                     | 1342            | 2.66 $\pm$ 0.83    | 2.96 $\pm$ 0.75    | 9.12 $\pm$ 0.83    | 5.38 $\pm$ 1.09    | 3.33 $\pm$ 0.77     |
| 6-Ethenyl-2,2,6-trimethyloxan-3-ol                                                                                             | 1704            | 15.80 $\pm$ 2.68   | ND                 | 1.81 $\pm$ 0.59    | 1.52 $\pm$ 0.60    | ND                  |
| ( <i>Z</i> )-Hex-3-en-1-ol                                                                                                     | 1370            | 3.57 $\pm$ 0.78    | 1.68 $\pm$ 0.64    | 4.66 $\pm$ 0.21    | 6.24 $\pm$ 1.38    | 2.20 $\pm$ 0.44     |
| (1 <i>S</i> ,2 <i>R</i> ,5 <i>S</i> ,7 <i>R</i> ,8 <i>R</i> )-2,6,6,8-Tetramethyltricyclo[5.3.1.0 <sup>1,5</sup> ]undecan-8-ol | 2022            | 2.52 $\pm$ 0.26    | 1.91 $\pm$ 0.14    | 2.09 $\pm$ 0.75    | 2.97 $\pm$ 0.59    | 8.25 $\pm$ 1.36     |
| Phenylmethanol                                                                                                                 | 1821            | 3.48 $\pm$ 1.20    | 2.44 $\pm$ 0.24    | 4.27 $\pm$ 0.53    | 4.31 $\pm$ 0.98    | 2.90 $\pm$ 0.23     |
| Nonan-1-ol                                                                                                                     | 1628            | 1.54 $\pm$ 0.22    | 6.23 $\pm$ 0.31    | 2.64 $\pm$ 0.39    | 3.94 $\pm$ 0.45    | 2.35 $\pm$ 0.47     |
| 2-Ethylhexan-1-ol                                                                                                              | 1465            | 2.07 $\pm$ 0.71    | 1.27 $\pm$ 0.25    | 3.67 $\pm$ 1.36    | 4.78 $\pm$ 1.51    | 4.37 $\pm$ 0.29     |
| (6 <i>E</i> )-3,7,11-Trimethyldodeca-1,6,10-trien-3-ol                                                                         | 1899            | ND                 | ND                 | 3.37 $\pm$ 0.76    | 1.37 $\pm$ 0.33    | 10.67 $\pm$ 2.40    |
| ( <i>E</i> )-Hex-2-en-1-ol                                                                                                     | 1390            | 3.20 $\pm$ 0.42    | 3.51 $\pm$ 0.67    | 3.03 $\pm$ 0.29    | 4.96 $\pm$ 0.74    | ND                  |
| Dodecan-1-ol                                                                                                                   | 1868            | 2.83 $\pm$ 0.52    | 1.65 $\pm$ 0.30    | 1.69 $\pm$ 0.54    | 1.57 $\pm$ 0.36    | 6.73 $\pm$ 0.66     |
| (6,6-Dimethyl-2-bicyclo[3.1.1]hept-2-enyl)methanol                                                                             | 1752            | ND                 | 8.44 $\pm$ 1.32    | ND                 | ND                 | ND                  |
| (5 <i>E</i> )-3,7-Dimethylocta-1,5,7-trien-3-ol                                                                                | 1582            | 2.62 $\pm$ 0.49    | 0.79 $\pm$ 0.07    | 0.26 $\pm$ 0.04    | 2.20 $\pm$ 0.33    | 2.44 $\pm$ 0.27     |
| Octan-1-ol                                                                                                                     | 1533            | ND                 | ND                 | 3.38 $\pm$ 1.56    | 3.55 $\pm$ 0.84    | ND                  |
| ( <i>Z</i> )-Non-3-en-1-ol                                                                                                     | 1650            | 0.78 $\pm$ 0.27    | 1.38 $\pm$ 0.10    | 1.29 $\pm$ 0.21    | 1.33 $\pm$ 0.12    | ND                  |
| (1 <i>S</i> ,4 <i>R</i> )-1,6-Dimethyl-4-propan-2-yl-3,4,4a,7,8,8a-hexahydro-2H-naphthalen-1-ol                                | 2044            | 0.85 $\pm$ 0.20    | 0.47 $\pm$ 0.02    | ND                 | 0.66 $\pm$ 0.29    | 1.95 $\pm$ 0.30     |
| Heptan-2-ol                                                                                                                    | 1310            | 3.06 $\pm$ 1.24    | ND                 | ND                 | ND                 | ND                  |
| (3 <i>Z</i> )-3,7-Dimethylocta-3,6-dien-1-ol                                                                                   | 1774            | ND                 | ND                 | 1.54 $\pm$ 0.14    | 0.62 $\pm$ 0.21    | ND                  |
| Heptan-1-ol                                                                                                                    | 1436            | ND                 | 0.68 $\pm$ 0.18    | 0.49 $\pm$ 0.10    | 0.70 $\pm$ 0.05    | ND                  |
| (3 <i>E</i> ,6 <i>E</i> )-Nona-3,6-dien-1-ol                                                                                   | 1717            | ND                 | ND                 | 0.64 $\pm$ 0.19    | 0.56 $\pm$ 0.11    | ND                  |
| Total alcohols                                                                                                                 |                 | 965.82 $\pm$ 62.61 | 365.99 $\pm$ 42.71 | 439.17 $\pm$ 45.51 | 511.86 $\pm$ 44.46 | 1204.65 $\pm$ 78.42 |
| <i>Aldehydes</i>                                                                                                               |                 |                    |                    |                    |                    |                     |
| 2,4-Dimethylbenzaldehyde                                                                                                       | 1765            | 56.69 $\pm$ 13.80  | 44.58 $\pm$ 6.19   | 48.96 $\pm$ 1.08   | 46.38 $\pm$ 1.61   | 197.64 $\pm$ 18.64  |
| (2 <i>E</i> )-3,7-Dimethylocta-2,6-dienal                                                                                      | 1690            | 15.44 $\pm$ 2.12   | ND                 | 21.30 $\pm$ 2.28   | 10.14 $\pm$ 0.99   | 54.96 $\pm$ 4.15    |

|                                                                             |      |             |             |             |            |              |
|-----------------------------------------------------------------------------|------|-------------|-------------|-------------|------------|--------------|
| (2Z)-3,7-Dimethylocta-2,6-dienal                                            | 1643 | 5.30±0.24   | 16.04±2.33  | 8.35±1.04   | 3.72±0.53  | 14.91±0.86   |
| (E)-Hex-2-enal                                                              | 1189 | ND          | 8.16±2.24   | 8.72±0.82   | 11.86±1.60 | 6.89±1.19    |
| Hexanal                                                                     | 1044 | 3.46±0.43   | 3.50±0.91   | 4.58±0.54   | 5.41±1.00  | 3.89±0.60    |
| Nonanal                                                                     | 1348 | 2.19±0.36   | 2.19±0.78   | 2.20±0.31   | 2.12±0.84  | 8.68±2.22    |
| 3-Methylbutanal                                                             | 936  | 3.55±0.80   | 2.33±0.82   | 6.87±0.52   | 3.43±0.48  | ND           |
| Benzaldehyde                                                                | 1487 | 4.58±0.80   | 2.09±0.26   | 3.56±0.78   | 2.27±0.05  | 2.29±0.33    |
| (4E,8E)-5,9,13-Trimethyltetradeca-4,8,12-trienal                            | 2066 | 1.02±0.07   | ND          | ND          | 0.98±0.27  | 12.57±2.00   |
| Decanal                                                                     | 1452 | ND          | 0.87±0.15   | ND          | ND         | 4.10±1.20    |
| (2E,4E)-Hepta-2,4-dienal                                                    | 1439 | 0.96±0.18   | 1.72±0.43   | ND          | 2.00±0.24  | ND           |
| (E)-Oct-2-enal                                                              | 1396 | 1.61±0.53   | 1.19±0.27   | 0.53±0.14   | 1.16±0.12  | ND           |
| 7,7-Dimethoxyheptanal                                                       | 1585 | ND          | 0.42±0.02   | 0.64±0.25   | 0.52±0.09  | 2.12±0.61    |
| 2,6,6-Trimethylcyclohexene-1-carbaldehyde                                   | 1572 | ND          | 1.43±0.82   | ND          | 0.87±0.20  | ND           |
| Pentanal                                                                    | 961  | ND          | 0.36±0.11   | 0.27±0.09   | 0.35±0.12  | ND           |
| (Z)-Hept-2-enal                                                             | 1289 | ND          | 0.44±0.14   | ND          | 0.51±0.09  | ND           |
| (E)-Non-2-enal                                                              | 1497 | ND          | 0.42±0.05   | ND          | 0.28±0.03  | ND           |
| (2E,6Z)-Nona-2,6-dienal                                                     | 1552 | ND          | ND          | 0.29±0.04   | 0.37±0.06  | ND           |
| Total aldehydes                                                             |      | 94.79±15.21 | 85.75±12.75 | 106.27±6.77 | 92.38±6.31 | 308.03±18.18 |
| <i>Ketones</i>                                                              |      |             |             |             |            |              |
| 6-Methylhept-5-en-2-one                                                     | 1311 | ND          | 1.22±0.24   | 3.08±0.29   | 1.11±0.18  | 3.77±0.77    |
| 3-Methyl-2-[(Z)-pent-2-enyl]cyclopent-2-en-1-one                            | 1850 | ND          | 2.33±0.15   | 1.34±0.35   | 5.45±1.30  | ND           |
| (E)-4-(2,6,6-Trimethylcyclohexen-1-yl)but-3-en-2-one                        | 1846 | 1.58±0.85   | 1.87±0.20   | 3.18±0.60   | 1.87±0.34  | ND           |
| 6,10,14-Trimethylpentadecan-2-one                                           | 2027 | 1.27±0.14   | ND          | 0.64±0.09   | 1.22±0.19  | ND           |
| Heptadecan-2-one                                                            | 1891 | ND          | 0.45±0.04   | 0.23±0.04   | ND         | ND           |
| Octane-2,3-dione                                                            | 1290 | ND          | ND          | 0.53±0.08   | ND         | ND           |
| Total ketones                                                               |      | 2.84±0.98   | 5.86±0.50   | 9.01±1.14   | 9.65±0.71  | 3.77±0.77    |
| <i>Esters</i>                                                               |      |             |             |             |            |              |
| Methyl 2-hydroxybenzoate                                                    | 1727 | 44.92±5.46  | 45.20±6.95  | 54.81±7.81  | 75.57±6.59 | 63.89±9.22   |
| Bis(2-methylpropyl) benzene-1,2-dicarboxylate                               | 2118 | 10.48±2.95  | 4.84±1.16   | 6.94±1.71   | 5.12±0.20  | 26.35±5.25   |
| Diethyl benzene-1,2-dicarboxylate                                           | 2084 | 3.58±1.84   | 5.08±2.22   | 2.59±0.05   | ND         | 24.92±8.43   |
| 1-O-(2-Methylpropyl) 4-O-propan-2-yl 2,2-dimethyl-3-propan-2-ylbutanedioate | 1817 | ND          | 3.73±0.38   | 2.06±1.59   | 3.42±0.55  | 7.22±1.81    |
| Methyl hexadecanoate                                                        | 2051 | 4.01±0.76   | 2.19±0.52   | 0.89±0.46   | 1.23±0.23  | 6.29±2.13    |
| Dibutyl benzene-1,2-dicarboxylate                                           | 2033 | ND          | ND          | 2.99±0.46   | ND         | ND           |
| Methyl 2-methyl-3-oxobutanoate                                              | 1669 | ND          | ND          | 0.81±0.24   | 0.81±0.05  | ND           |
| Total esters                                                                |      | 62.99±7.38  | 61.03±7.51  | 71.1±8.99   | 86.15±5.80 | 128.68±3.88  |

|                                                                   |      |               |              |              |              |               |
|-------------------------------------------------------------------|------|---------------|--------------|--------------|--------------|---------------|
| <i>Acids</i>                                                      |      |               |              |              |              |               |
| Dodecanoic acid                                                   | 2104 | ND            | 2.22±0.89    | 2.02±0.39    | 2.75±0.38    | 20.70±1.39    |
| Octadecanoic acid                                                 | 2064 | ND            | ND           | ND           | ND           | 6.07±1.17     |
| Nonanoic acid                                                     | 2040 | ND            | ND           | 1.23±0.39    | 2.18±0.27    | ND            |
| Total acids                                                       |      | ND            | 2.22±0.89    | 3.25±0.39    | 4.93±0.32    | 26.77±2.55    |
| <i>Pyrroles</i>                                                   |      |               |              |              |              |               |
| 1-Ethylpyrrole-2-carbaldehyde                                     | 1571 | ND            | ND           | 3.42±1.21    | ND           | ND            |
| <i>Miscellaneous</i>                                              |      |               |              |              |              |               |
| 7-Methyl-3-methylideneocta-1,6-diene                              |      | 27.02±4.25    | 17.29±1.36   | 22.52±3.77   | 18.61±2.73   | 76.74±13.34   |
| Naphthalene                                                       | 1114 | 19.93±8.50    | 19.79±1.14   | 10.02±1.85   | 9.69±1.15    | 51.55±6.86    |
| (3 <i>E</i> )-3,7-Dimethylocta-1,3,6-triene                       | 1684 | 19.78±3.47    | 13.25±1.84   | 18.48±3.46   | 15.37±1.72   | 84.69±17.30   |
| 2,4-Ditert-butylphenol                                            | 1186 | 23.02±2.00    | 15.68±1.42   | 14.96±3.12   | ND           | ND            |
| Methylsulfanylmethane                                             | 2071 | 12.42±2.14    | 8.41±0.60    | 9.67±1.52    | 6.43±2.11    | 4.05±0.68     |
| Methyl (Z)-N-hydroxybenzenecarboximidate                          | 899  | 10.53±1.77    | ND           | ND           | 1.87±0.27    | 6.69±0.70     |
| (4 <i>S</i> )-1-Methyl-4-prop-1-en-2-ylcyclohexene                | 1750 | 8.39±1.91     | 2.36±0.53    | 2.66±0.60    | 3.37±0.61    | ND            |
| 1,2,4,5-Tetramethylbenzene                                        | 1133 | 3.35±0.78     | ND           | 1.62±0.71    | 1.46±0.06    | 9.34±0.32     |
| 1,2,3,4-Tetramethyl-5-methylidenecyclopenta-1,3-diene             | 1380 | ND            | 1.81±0.40    | 0.41±0.07    | 1.87±0.13    | ND            |
| (1 <i>S</i> ,6 <i>R</i> )-3,7,7-Trimethylbicyclo[4.1.0]hept-2-ene | 1433 | ND            | 0.53±0.03    | ND           | ND           | 2.06±0.44     |
| 2-Methyl-5-propan-2-ylcyclohexa-1,3-diene                         | 1122 | 0.67±0.21     | 0.22±0.06    | 0.32±0.05    | 0.25±0.04    | 1.06±0.18     |
| Total miscellaneous                                               | 1112 | 125.12±8.73   | 79.34±4.24   | 80.65±12.66  | 58.92±5.38   | 236.17±27.85  |
| Total volatiles                                                   |      | 1251.56±70.55 | 600.20±64.47 | 712.87±74.63 | 763.88±58.38 | 1908.05±86.87 |

<sup>a</sup> The data were expressed as mean value ± SD; ND: Not detected.

<sup>b</sup> RI: Retention index.

Table S4 The volatile compositions of freeze dried teas from different tea cultivars ( $\mu\text{g}$  guaiacol equivalent/g dry tea).<sup>a</sup>

| Compounds                                                                                                                      | RI <sup>b</sup> | Chunyu2              | Chunyu1            | Longjing43          | Zhenong117           | Jinguanyin          |
|--------------------------------------------------------------------------------------------------------------------------------|-----------------|----------------------|--------------------|---------------------|----------------------|---------------------|
| <i>Alcohols</i>                                                                                                                |                 |                      |                    |                     |                      |                     |
| 3,7-Dimethylocta-1,6-dien-3-ol                                                                                                 | 1524            | 1224.71 $\pm$ 95.67  | 286.63 $\pm$ 12.32 | 393.09 $\pm$ 22.07  | 675.84 $\pm$ 85.95   | 260.00 $\pm$ 11.04  |
| (2 <i>E</i> )-3,7-dimethylocta-2,6-dien-1-ol                                                                                   | 1806            | 441.89 $\pm$ 28.02   | 404.07 $\pm$ 23.81 | 817.37 $\pm$ 20.12  | 363.11 $\pm$ 49.35   | 755.01 $\pm$ 56.86  |
| 2-[(2 <i>S</i> ,5 <i>S</i> )-5-Ethenyl-5-methyloxolan-2-yl]propan-2-ol                                                         | 1443            | 86.26 $\pm$ 8.06     | 34.89 $\pm$ 2.11   | 69.78 $\pm$ 2.71    | 27.87 $\pm$ 6.84     | 37.96 $\pm$ 4.13    |
| Nonan-1-ol                                                                                                                     | 1628            | 8.00 $\pm$ 0.57      | 19.57 $\pm$ 1.28   | 13.62 $\pm$ 1.84    | 13.27 $\pm$ 1.89     | 4.12 $\pm$ 0.37     |
| 2-[(1 <i>S</i> )-4-Methylcyclohex-3-en-1-yl]propan-2-ol                                                                        | 1664            | 32.65 $\pm$ 2.65     | 7.43 $\pm$ 0.09    | ND                  | 8.02 $\pm$ 1.78      | 6.02 $\pm$ 1.41     |
| Dodecan-1-ol                                                                                                                   | 1868            | 13.87 $\pm$ 3.03     | 5.34 $\pm$ 1.08    | 13.13 $\pm$ 2.76    | 4.80 $\pm$ 1.99      | 8.66 $\pm$ 0.86     |
| (1 <i>S</i> ,2 <i>R</i> ,5 <i>S</i> ,7 <i>R</i> ,8 <i>R</i> )-2,6,6,8-Tetramethyltricyclo[5.3.1.0 <sup>1,5</sup> ]undecan-8-ol | 2022            | 8.81 $\pm$ 0.63      | 5.53 $\pm$ 0.23    | 14.16 $\pm$ 3.65    | 6.21 $\pm$ 1.84      | 8.18 $\pm$ 1.80     |
| 2-Ethylhexan-1-ol                                                                                                              | 1465            | 4.14 $\pm$ 0.34      | 5.57 $\pm$ 1.66    | 12.92 $\pm$ 1.06    | 3.87 $\pm$ 0.10      | 1.70 $\pm$ 0.37     |
| Octan-1-ol                                                                                                                     | 1533            | ND                   | 8.52 $\pm$ 1.54    | 14.39 $\pm$ 2.86    | ND                   | 3.76 $\pm$ 1.00     |
| 2-Phenylethanol                                                                                                                | 1838            | 3.74 $\pm$ 0.16      | 4.86 $\pm$ 0.71    | 7.75 $\pm$ 0.75     | 5.84 $\pm$ 0.29      | 2.92 $\pm$ 0.18     |
| ( <i>Z</i> )-Hex-3-en-1-ol                                                                                                     | 1370            | 4.72 $\pm$ 1.38      | ND                 | 8.05 $\pm$ 0.86     | 4.06 $\pm$ 1.00      | 1.78 $\pm$ 0.29     |
| (6 <i>E</i> )-3,7,11-Trimethyldodeca-1,6,10-trien-3-ol                                                                         | 1899            | ND                   | ND                 | ND                  | ND                   | 17.75 $\pm$ 2.71    |
| Tetradecan-1-ol                                                                                                                | 2041            | 8.07 $\pm$ 1.42      | ND                 | 5.74 $\pm$ 1.51     | ND                   | 3.78 $\pm$ 0.37     |
| Heptan-1-ol                                                                                                                    | 1436            | ND                   | 4.27 $\pm$ 0.06    | 4.14 $\pm$ 0.22     | 3.44 $\pm$ 0.59      | ND                  |
| Heptan-2-ol                                                                                                                    | 1310            | 9.30 $\pm$ 1.29      | ND                 | ND                  | ND                   | ND                  |
| Hexan-1-ol                                                                                                                     | 1342            | ND                   | 1.95 $\pm$ 0.54    | 4.99 $\pm$ 0.06     | 1.71 $\pm$ 0.48      | ND                  |
| Oct-1-en-3-ol                                                                                                                  | 1428            | ND                   | 1.42 $\pm$ 0.04    | 3.89 $\pm$ 0.87     | 1.14 $\pm$ 0.44      | 1.26 $\pm$ 0.31     |
| Phenylmethanol                                                                                                                 | 1821            | ND                   | ND                 | ND                  | 3.20 $\pm$ 0.48      | 2.77 $\pm$ 0.05     |
| (3 <i>Z</i> )-3,7-Dimethylocta-3,6-dien-1-ol                                                                                   | 1774            | 1.59 $\pm$ 0.17      | ND                 | 2.74 $\pm$ 0.49     | ND                   | ND                  |
| (1 <i>S</i> ,4 <i>R</i> )-1,6-Dimethyl-4-propan-2-yl-3,4,4a,7,8,8a-hexahydro-2H-naphthalen-1-ol                                | 2044            | ND                   | 0.9 $\pm$ 0.07     | ND                  | ND                   | 3.31 $\pm$ 1.00     |
| (5 <i>E</i> )-3,7-Dimethylocta-1,5,7-trien-3-ol                                                                                | 1582            | 1.33 $\pm$ 0.22      | ND                 | ND                  | 1.22 $\pm$ 0.34      | ND                  |
| Total alcohols                                                                                                                 |                 | 1849.07 $\pm$ 140.09 | 790.95 $\pm$ 33.47 | 1385.77 $\pm$ 39.62 | 1123.62 $\pm$ 144.65 | 1118.96 $\pm$ 64.40 |
| <i>Aldehydes</i>                                                                                                               |                 |                      |                    |                     |                      |                     |
| 2,4-Dimethylbenzaldehyde                                                                                                       | 1765            | 245.54 $\pm$ 15.53   | 163.45 $\pm$ 16.05 | 280.91 $\pm$ 19.62  | 281.85 $\pm$ 30.53   | 149.01 $\pm$ 16.77  |
| ( <i>E</i> )-hex-2-enal                                                                                                        | 1189            | 264.38 $\pm$ 31.47   | 110.9 $\pm$ 2.08   | 292.51 $\pm$ 24.96  | 201.02 $\pm$ 25.62   | 36.54 $\pm$ 3.23    |
| Hexanal                                                                                                                        | 1044            | 18.40 $\pm$ 1.59     | 13.20 $\pm$ 0.20   | 95.67 $\pm$ 7.55    | 29.20 $\pm$ 1.26     | 7.33 $\pm$ 1.28     |
| (2 <i>E</i> )-3,7-Dimethylocta-2,6-dienal                                                                                      | 1690            | 17.24 $\pm$ 1.84     | 14.21 $\pm$ 2.18   | 50.91 $\pm$ 3.09    | 15.48 $\pm$ 0.71     | 38.18 $\pm$ 4.47    |
| Nonanal                                                                                                                        | 1348            | 10.90 $\pm$ 2.00     | 6.85 $\pm$ 1.64    | 11.92 $\pm$ 1.82    | 8.53 $\pm$ 1.57      | 7.00 $\pm$ 1.74     |
| (2 <i>E</i> ,4 <i>E</i> )-Hepta-2,4-dienal                                                                                     | 1439            | 6.33 $\pm$ 0.52      | 3.48 $\pm$ 0.19    | 9.71 $\pm$ 1.30     | 7.93 $\pm$ 2.12      | 3.18 $\pm$ 0.71     |



|                                                                     |      |              |              |              |              |              |
|---------------------------------------------------------------------|------|--------------|--------------|--------------|--------------|--------------|
| (4 <i>E</i> ,8 <i>E</i> )-5,9,13-Trimethyltetradeca-4,8,12-trienal  | 2066 | 7.08±1.20    | 4.32±0.66    | 3.61±1.82    | 5.37±0.22    | 6.52±0.95    |
| (2 <i>Z</i> )-3,7-Dimethylocta-2,6-dienal                           | 1643 | 1.32±0.17    | 1.20±0.01    | 6.69±0.94    | 0.97±0.23    | 7.90±0.87    |
| Benzaldehyde                                                        | 1487 | 3.01±0.23    | 1.61±0.14    | 5.30±0.68    | 2.68±0.19    | 2.77±0.09    |
| Decanal                                                             | 1452 | 4.15±1.35    | 2.61±0.68    | ND           | ND           | 7.59±1.69    |
| (2 <i>E</i> ,6 <i>Z</i> )-Nona-2,6-dienal                           | 1552 | 3.67±0.26    | 1.43±0.25    | 4.82±0.22    | 3.99±0.93    | ND           |
| 7,7-Dimethoxyheptanal                                               | 1585 | ND           | 4.32±1.01    | 4.88±0.36    | 4.08±0.66    | ND           |
| Octadecanal                                                         | 1894 | ND           | ND           | 4.17±0.73    | ND           | 5.70±5.73    |
| ( <i>E</i> )-Oct-2-enal                                             | 1396 | 1.89±0.07    | 1.47±0.22    | 3.44±0.43    | 1.84±0.54    | ND           |
| Heptanal                                                            | 1141 | ND           | ND           | ND           | ND           | 4.44±0.95    |
| ( <i>E</i> )-Non-2-enal                                             | 1497 | ND           | ND           | 2.46±0.30    | 1.78±0.30    | ND           |
| Total aldehydes                                                     |      | 583.89±52.05 | 329.07±18.39 | 776.97±49.00 | 564.73±34.33 | 276.15±26.11 |
| <i>Ketones</i>                                                      |      |              |              |              |              |              |
| 3-Methyl-2-[( <i>Z</i> )-pent-2-enyl]cyclopent-2-en-1-one           | 1850 | 4.97±0.57    | 6.69±0.82    | 6.02±0.34    | 14.91±1.33   | 8.40±1.44    |
| (3 <i>E</i> ,5 <i>E</i> )-Octa-3,5-dien-2-one                       | 1492 | ND           | ND           | 10.97±0.87   | 7.31±1.00    | ND           |
| ( <i>E</i> )-4-(2,6,6-Trimethylcyclohexen-1-yl)but-3-en-2-one       | 1846 | 4.48±0.53    | ND           | 6.03±0.57    | 2.82±0.27    | ND           |
| 6,10,14-Trimethylpentadecan-2-one                                   | 2027 | 7.88±1.67    | ND           | ND           | ND           | 3.71±1.73    |
| 6-Methylhept-5-en-2-one                                             | 1311 | 1.81±0.17    | 0.87±0.12    | 2.07±0.57    | ND           | 1.92±0.21    |
| Heptadecan-2-one                                                    | 1891 | ND           | ND           | 2.25±0.33    | ND           | ND           |
| Total ketones                                                       |      | 19.15±1.54   | 7.56±0.83    | 27.33±0.92   | 25.04±2.59   | 14.03±2.12   |
| <i>Esters</i>                                                       |      |              |              |              |              |              |
| Methyl 2-hydroxybenzoate                                            | 1727 | 15.32±2.25   | 36.83±2.94   | 71.10±5.86   | 57.12±5.04   | 23.95±1.29   |
| Bis(2-methylpropyl) benzene-1,2-dicarboxylate                       | 2118 | 57.69±8.02   | 22.61±4.23   | 49.10±13.00  | 28.82±7.28   | 32.48±3.82   |
| [2,2,4-Trimethyl-3-(2-methylpropanoyloxy)pentyl] 2-methylpropanoate | 1818 | 35.51±10.04  | 24.51±4.70   | 60.42±10.19  | 16.56±2.60   | 22.74±3.32   |
| Dibutyl benzene-1,2-dicarboxylate                                   | 2033 | ND           | 16.24±3.71   | 20.67±4.74   | ND           | 22.32±0.69   |
| (3-Hydroxy-2,4,4-trimethylpentyl) 2-methylpropanoate                | 1815 | 12.32±0.56   | ND           | 30.59±6.68   | ND           | 10.46±1.81   |
| Methyl hexadecanoate                                                | 2051 | 8.67±2.09    | ND           | 8.04±0.62    | 6.54±2.29    | 7.58±2.39    |
| 2-Ethylhexyl 2-hydroxybenzoate                                      | 2069 | 5.40±1.79    | ND           | 10.05±0.89   | ND           | 2.99±0.17    |
| [( <i>Z</i> )-Hex-3-enyl] acetate                                   | 1279 | 2.96±0.10    | ND           | ND           | 7.68±1.72    | ND           |
| Propan-2-yl tetradecanoate                                          | 1897 | ND           | ND           | 5.94±1.06    | ND           | 3.94±2.61    |
| Total esters                                                        |      | 137.87±17.55 | 100.19±8.66  | 255.91±33.03 | 116.71±13.55 | 126.47±10.75 |
| <i>Acid</i>                                                         |      |              |              |              |              |              |
| Dodecanoic acid                                                     | 2104 | 12.58±1.67   | 4.92±2.02    | 13.32±2.95   | 11.66±3.69   | 8.68±1.71    |
| <i>Miscellaneous</i>                                                |      |              |              |              |              |              |
| 7-Methyl-3-methylideneocta-1,6-diene                                | 1114 | 73.78±7.86   | 36.9±5.09    | 106.92±2.69  | 57.29±8.58   | 84.15±14.29  |

|                                                                        |      |                |               |               |                |               |
|------------------------------------------------------------------------|------|----------------|---------------|---------------|----------------|---------------|
| 2,4-Ditert-butylphenol                                                 | 2071 | 77.34±8.88     | 72.5±2.78     | 92.61±19.22   | 66.95±10.24    | 53.89±6.99    |
| Naphthalene                                                            | 1684 | 42.20±1.80     | 28.59±2.88    | 63.03±8.33    | 55.74±4.30     | 38.59±4.67    |
| (3 <i>E</i> )-3,7-Dimethylocta-1,3,6-triene (β-ocimene)                | 1186 | 38.25±4.00     | 19.73±3.97    | 51.93±1.42    | 23.22±3.39     | 47.43±10.92   |
| (3 <i>E</i> )-3,7-Dimethylocta-1,3,6-triene ( <i>trans</i> -β-ocimene) | 1170 | 22.83±2.58     | 11.48±1.22    | 32.21±1.45    | 14.37±1.91     | 36.72±3.83    |
| (4 <i>S</i> )-1-Methyl-4-prop-1-en-2-ylcyclohexene                     | 1133 | 20.52±0.74     | ND            | 14.07±1.47    | 12.14±1.23     | 11.55±2.31    |
| Methyl (Z)-N-hydroxybenzenecarboximidate                               | 1750 | 9.96±1.22      | ND            | 10.29±1.32    | 9.06±2.12      | 11.07±2.88    |
| 1,2,4,5-Tetramethylbenzene                                             | 1380 | 6.81±1.29      | 4.12±0.38     | 8.68±1.38     | 6.65±1.45      | 5.48±1.01     |
| 4,7-Dimethyl-1-propan-2-yl-1,2,3,5,6,8a-hexahydronaphthalene           | 1692 | 5.00±0.49      | 3.14±0.16     | 3.88±0.36     | ND             | 14.44±2.28    |
| 4-Methylidene-1-propan-2-ylbicyclo[3.1.0]hexane                        | 1143 | 5.24±1.22      | ND            | 5.30±0.85     | ND             | ND            |
| (1 <i>S</i> ,6 <i>R</i> )-3,7,7-Trimethylbicyclo[4.1.0]hept-2-ene      | 1122 | ND             | ND            | 2.72±0.09     | 1.82±0.52      | 2.71±0.63     |
| 2-Methyl-5-propan-2-ylcyclohexa-1,3-diene                              | 1112 | 1.73±0.27      | 0.51±0.09     | ND            | 0.69±0.14      | 1.28±0.23     |
| Methylsulfanylmethane                                                  | 899  | ND             | ND            | 3.86±0.27     | ND             | ND            |
| Total miscellaneous                                                    |      | 303.67±24.86   | 176.96±10.85  | 395.50±23.89  | 247.93±15.88   | 307.32±33.30  |
| Total volatiles                                                        |      | 2906.23±232.81 | 1409.65±63.75 | 2854.8±114.86 | 2089.68±161.87 | 1851.61±94.50 |

<sup>a</sup> The data were expressed as mean value ± SD; ND: Not detected.

<sup>b</sup> RI: Retention index.

Table S5 The IUPAC name list for the symbols in Fig. 6

| IUPAC name                                                             | Freeze dried tea   | Green tea         | Black tea         |
|------------------------------------------------------------------------|--------------------|-------------------|-------------------|
| <i>Alcohol</i>                                                         |                    |                   |                   |
| 3,7-Dimethylocta-1,6-dien-3-ol                                         | Fr-Alcohol-1       | G-Alcohol-1       | R-Alcohol-1       |
| (2 <i>E</i> )-3,7-Dimethylocta-2,6-dien-1-ol                           | Fr-Alcohol-2       | G-Alcohol-2       | R-Alcohol-2       |
| 2-[(2 <i>S</i> ,5 <i>S</i> )-5-Ethenyl-5-methyloxolan-2-yl]propan-2-ol | Fr-Alcohol-3       | G-Alcohol-3       | R-Alcohol-3       |
| ( <i>Z</i> )-Hex-3-en-1-ol                                             | Fr-Alcohol-4       | G-Alcohol-4       | R-Alcohol-4       |
| 2-[(1 <i>S</i> )-4-Methylcyclohex-3-en-1-yl]propan-2-ol                | Fr-Alcohol-5       | G-Alcohol-5       | R-Alcohol-5       |
| Dodecan-1-ol                                                           | Fr-Alcohol-6       | G-Alcohol-6       | R-Alcohol-6       |
| 2-Phenylethanol                                                        | Fr-Alcohol-7       | G-Alcohol-7       | R-Alcohol-7       |
| Hexan-1-ol                                                             | Fr-Alcohol-8       | G-Alcohol-8       | R-Alcohol-8       |
| 2-Ethylhexan-1-ol                                                      | Fr-Alcohol-9       | G-Alcohol-9       | R-Alcohol-9       |
| (5 <i>E</i> )-3,7-Dimethylocta-1,5,7-trien-3-ol                        | Fr-Alcohol-10      | G-Alcohol-10      | R-Alcohol-10      |
| Nonan-1-ol                                                             | Fr-Alcohol-11      | G-Alcohol-11      | R-Alcohol-11      |
| <i>Aldehyde</i>                                                        |                    |                   |                   |
| 2,4-Dimethylbenzaldehyde                                               | Fr-Aldehyde-1      | G-Aldehyde-1      | R-Aldehyde-1      |
| (2 <i>E</i> )-3,7-Dimethylocta-2,6-dienal                              | Fr-Aldehyde-2      | G-Aldehyde-2      | R-Aldehyde-2      |
| (2 <i>Z</i> )-3,7-Dimethylocta-2,6-dienal                              | Fr-Aldehyde-3      | G-Aldehyde-3      | R-Aldehyde-3      |
| Pentanal                                                               | Fr-Aldehyde-4      | G-Aldehyde-4      | R-Aldehyde-4      |
| Hexanal                                                                | Fr-Aldehyde-5      | G-Aldehyde-5      | R-Aldehyde-5      |
| Benzaldehyde                                                           | Fr-Aldehyde-6      | G-Aldehyde-6      | R-Aldehyde-6      |
| (2 <i>E</i> )-3,7-Dimethylocta-2,6-dienal                              | Fr-Aldehyde-7      | G-Aldehyde-7      | R-Aldehyde-7      |
| <i>Ester</i>                                                           |                    |                   |                   |
| Bis(2-methylpropyl) benzene-1,2-dicarboxylate                          | Fr-Ester-1         | G-Ester-1         | R-Ester-1         |
| Diethyl benzene-1,2-dicarboxylate                                      | Fr-Ester-2         | G-Ester-2         | R-Ester-2         |
| [( <i>Z</i> )-Hex-3-enyl] acetate                                      | Fr-Ester-3         | G-Ester-3         | R-Ester-3         |
| Methyl 2-hydroxybenzoate                                               | Fr-Ester-4         | G-Ester-4         | R-Ester-4         |
| <i>Ketone</i>                                                          |                    |                   |                   |
| ( <i>E</i> )-4-(2,6,6-Trimethylcyclohexen-1-yl)but-3-en-2-one          | Fr-Ketone-1        | G-Ketone-1        | R-Ketone-1        |
| 3-Methyl-2-[( <i>Z</i> )-pent-2-enyl]cyclopent-2-en-1-one              | Fr-Ketone-2        | G-Ketone-2        | R-Ketone-2        |
| <i>Miscellaneous</i>                                                   |                    |                   |                   |
| (3 <i>E</i> )-3,7-Dimethylocta-1,3,6-triene                            | Fr-Miscellaneous-1 | G-Miscellaneous-1 | R-Miscellaneous-1 |
| Naphthalene                                                            | Fr-Miscellaneous-2 | G-Miscellaneous-2 | R-Miscellaneous-2 |
| 2,4-Ditert-butylphenol                                                 | Fr-Miscellaneous-3 | G-Miscellaneous-3 | R-Miscellaneous-3 |

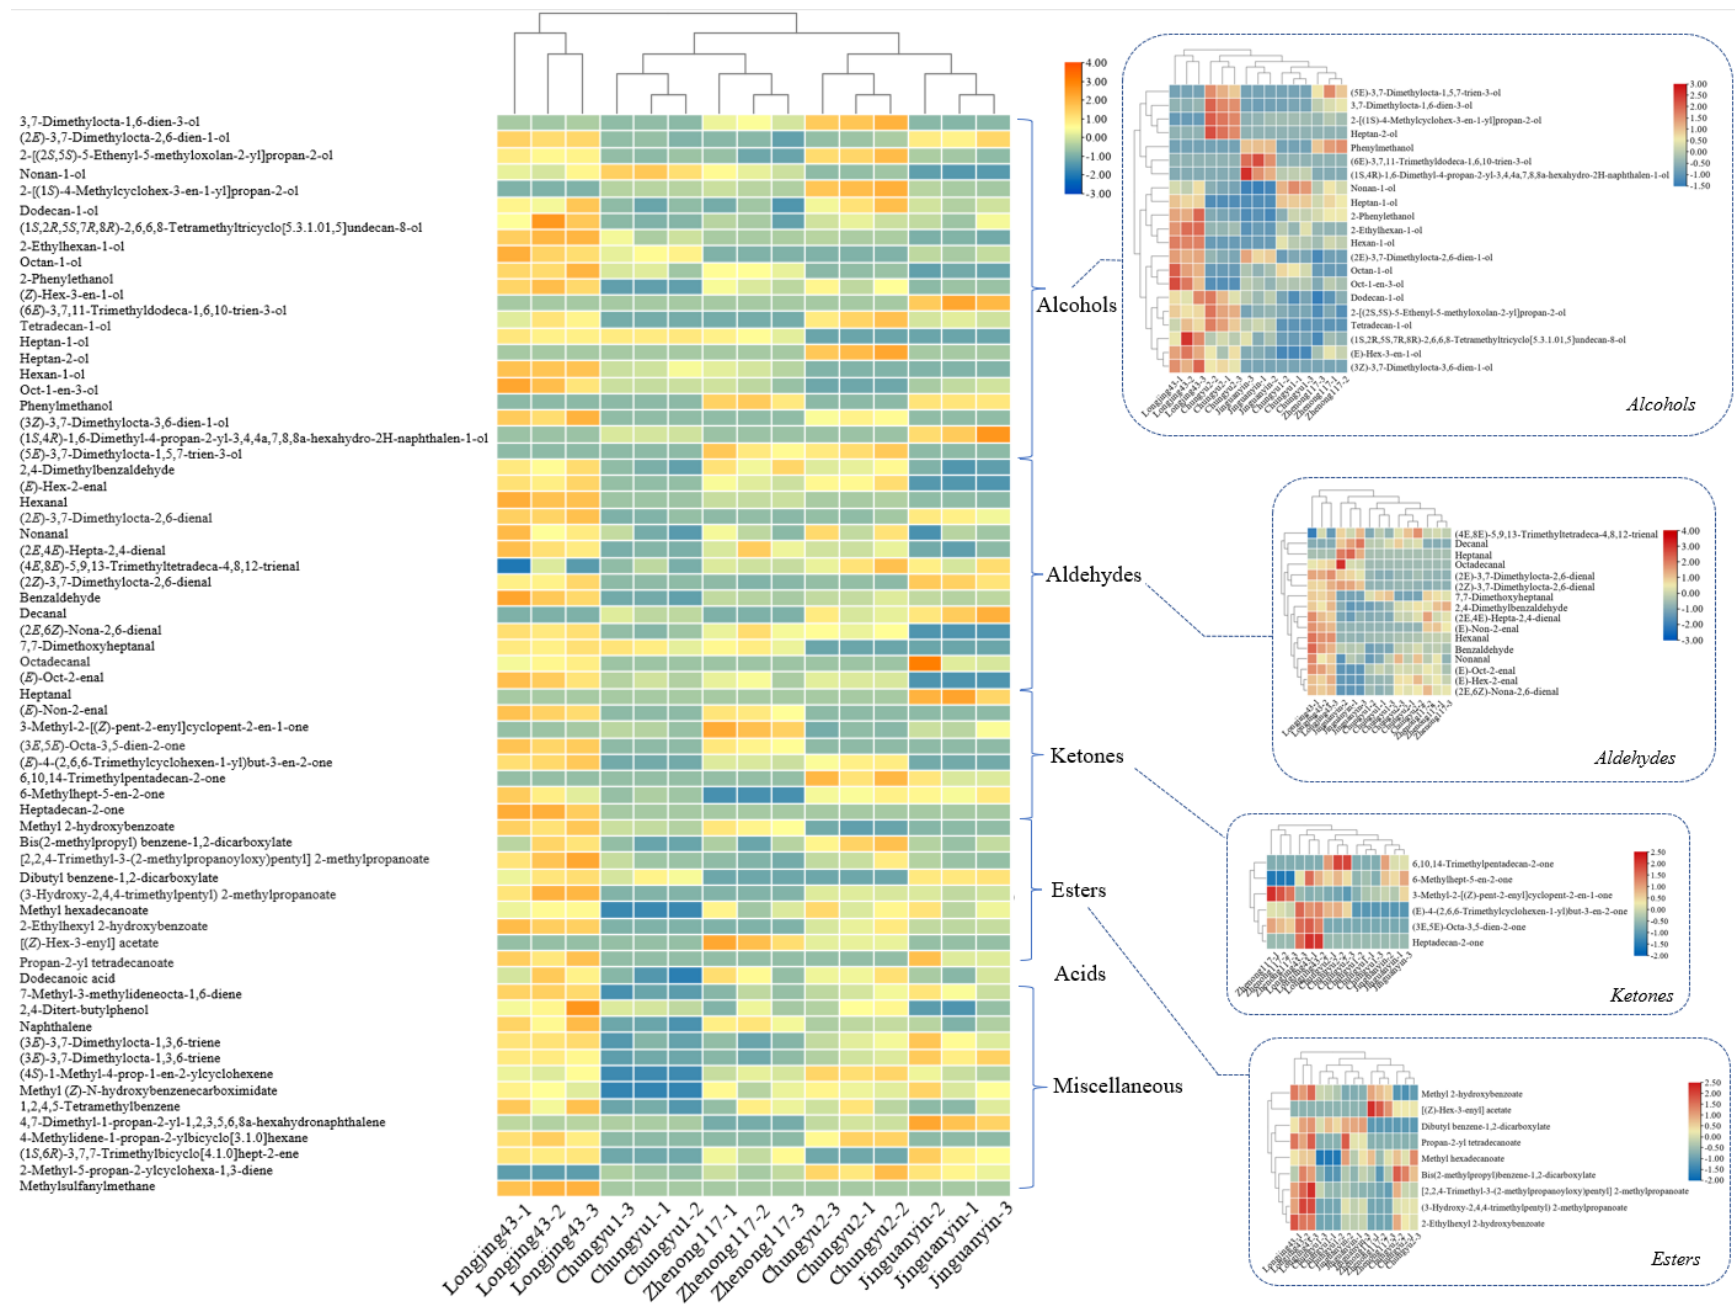

**Figure S1.** The hierarchically heatmap of the relative contents of volatile compounds in different freeze dried samples. Guaiacol was used as an internal standard to normalize the metabolite signal.

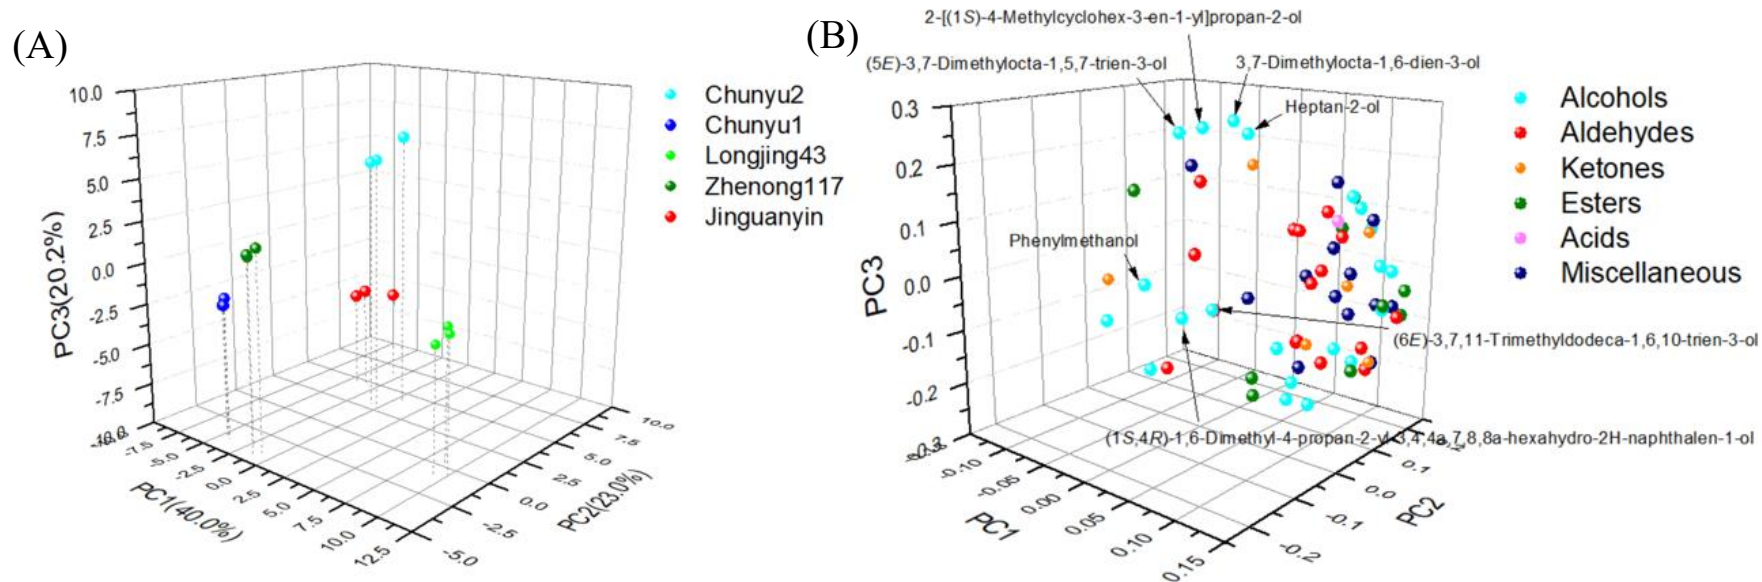

**Figure S2.** The PCA result of freeze dried samples of different tea cultivars based on the volatile compositions. (A) score plot; (B) loading plot. The number of replicates is equal to 3.
